# Supplementary material for: SigCom LINCS: data and metadata search engine for a million gene expression signatures
Source: PubMed Central journal article supplement — Nucleic Acids Res. 2022 May 7;50(W1):W697–709. doi: 10.1093/nar/gkac328 (PMC9252724; doi:10.1093/nar/gkac328), 2022-05-07
Supplement: gkac328_supplemental_file.pdf [file gkac328_supplemental_file.pdf]

## SUPPORTING ONLINE MATERIALS FOR:

### **SigCom LINCS: Data and Metadata Search Engine for a Million Gene Expression Signatures**

John Erol Evangelista<sup>1,+</sup>, Daniel J.B. Clarke<sup>1,+</sup>, Zhuorui Xie<sup>1,+</sup>, Alexander Lachmann<sup>1,+</sup>, Minji Jeon<sup>1</sup>, Kerwin Chen<sup>1</sup>, Kathleen M. Jagodnik<sup>1</sup>, Sherry L. Jenkins<sup>1</sup>, Maxim V. Kuleshov<sup>1</sup>, Megan L. Wojciechowicz<sup>1</sup>, Stephan Schurer<sup>2</sup>, Mario Medvedovic<sup>3</sup>, Avi Ma'ayan<sup>1,\*</sup>

<sup>1</sup>Department of Pharmacological Sciences, Mount Sinai Center for Bioinformatics, Icahn School of Medicine at Mount Sinai, One Gustave L. Levy Place, Box 1603, New York, NY 10029, USA

<sup>2</sup>Department of Biomedical Informatics, University of Cincinnati College of Medicine, Cincinnati, OH 45267, USA

<sup>3</sup>Department of Pharmacology, Miller School of Medicine, University of Miami, Miami, USA

+Contributed equally

\*To whom correspondence should be addressed: [avi.maayan@mssm.edu](mailto:avi.maayan@mssm.edu)

## SUPPORTING FIGURES

Fig. S1

The figure consists of two side-by-side panels, each representing a validation step in a software interface. Both panels have a 'Validate' button at the top left.

**Left Panel:**

- Validation status: 1 valid entry, 1 needs review.
- Input: A green pill-shaped button containing the variant 'chr13:g.32944582T>C' with 'x' icons on either side.
- Action: 'RESOLVE VARIANT NAME TO:'
- Result: 'BRCA2' is displayed in blue text.
- Output: A grey pill-shaped button containing 'STAT3' with a checkmark on the left and an 'x' icon on the right.

**Right Panel:**

- Validation status: 1 invalid entry, 1 needs review.
- Input: A yellow pill-shaped button containing 'S' with a warning icon on the left and an 'x' icon on the right.
- Action: 'DID YOU MEAN:'
- Result: 'CDSN' is displayed in blue text.
- Output: A red pill-shaped button containing 'SATS' with 'x' icons on either side.

**Fig. S1 Gene Names Validation.** SigCom LINCS validates user-inputted gene names against all the gene names registered in the SigCom LINCS metadata. The validation function provides an option for users to resolve synonymous IDs and gene names that do not have an exact match with the registered name. This function facilitates harmonization of the input sets with the gene metadata within SigCom LINCS.

Fig. S2

A

Identify reversers and mimickers from over 1.5 million signatures by entering up and down gene sets or by performing single gene search for co-expressed genes using the input form at the bottom.

Input a set of newline-separated Entrez gene symbols (up gene set).

Input a set of newline-separated Entrez gene symbols (down gene set).

MAPK1  
MAPK10  
MAPK11  
MAPK12  
MAPK13  
MAPK14  
MAPK15  
MAPK1IP1L

STAT3 / MAPK1 / ACE2 / rs28897756 / chr13:g.32944582T>C

Identify reversers and mimickers from over 1.5 million signatures by entering up and down gene sets or by performing single gene search for co-expressed genes using the input form at the bottom.

Validate 97 valid entries 3 invalid entries

CRKL  
CAB39  
FA2  
STXB5  
MTPN  
PPP2R1  
ZBTB34  
MAP3K4  
FAM6A1  
OSBP1B  
MEGF9  
SYNJ1

Validate 97 valid entries 3 invalid entries

EIF2B4  
WBSCR22  
RDM1  
IFT43  
HOCR2  
POU2H  
SHFM1  
SICCSA1  
TEC8  
SLBP  
MTG1  
ACY1

Single Gene Set  Up/Down Gene Sets

Try this example up and down gene set

MAPK1

Query a single gene or a variant to identify other genes that mostly positively or negatively correlate with the queried gene based on RNA-seq co-expression data from ARCHS4:

Enter gene

STAT3 / MAPK1 / ACE2 / rs28897756 / chr13:g.32944582T>C

B

Identify perturbations from over 1.5 million signatures that maximally up- or down-regulate the expression of a gene set. Enter a set of genes or fetch a gene set using the term search form at the bottom.

Input a set of newline-separated Entrez gene symbols.

GO Molecular Function 2017b

transmembrane receptor protein **tyrosine kinase** activity (GO:0004714)

protein **tyrosine kinase** activator activity (GO:0030296)

non-membrane spanning protein **tyrosine kinase** activity (GO:0004715)

protein serine/threonine/**tyrosine kinase** activity (GO:0004712)

protein **tyrosine kinase** inhibitor activity (GO:0030292)

GO Biological Process 2021

tyrosine kinase

breast cancer / tyrosine kinase

Identify perturbations from over 1.5 million signatures that maximally up- or down-regulate the expression of a gene set. Enter a set of genes or fetch a gene set using the term search form at the bottom.

Validate 114 valid entries

SCYL1  
KDR  
FGFR4  
ETC  
INSRR  
DYRK1A  
STAT5A  
EPHA2  
BLK  
SYK  
FGR  
FES

Single Gene Set  Up/Down Gene Sets

Try this example gene set

GO Molecular Function 2017b: transmembrane recep

Fetch annotated gene sets from Enrichr by querying any search term:

Enter search term

breast cancer / tyrosine kinase

**Fig. S2 Fetching signature search on co-expression and Enrichr gene sets.** SigCom LINCS can retrieve gene sets from other resources by (A) converting a single gene or a variant to up and down gene sets using ARCHS4 co-expression data, and (B) fetching Enrichr gene sets via its search term search API.

**Fig. S3**

## Signature Similarity Search Results

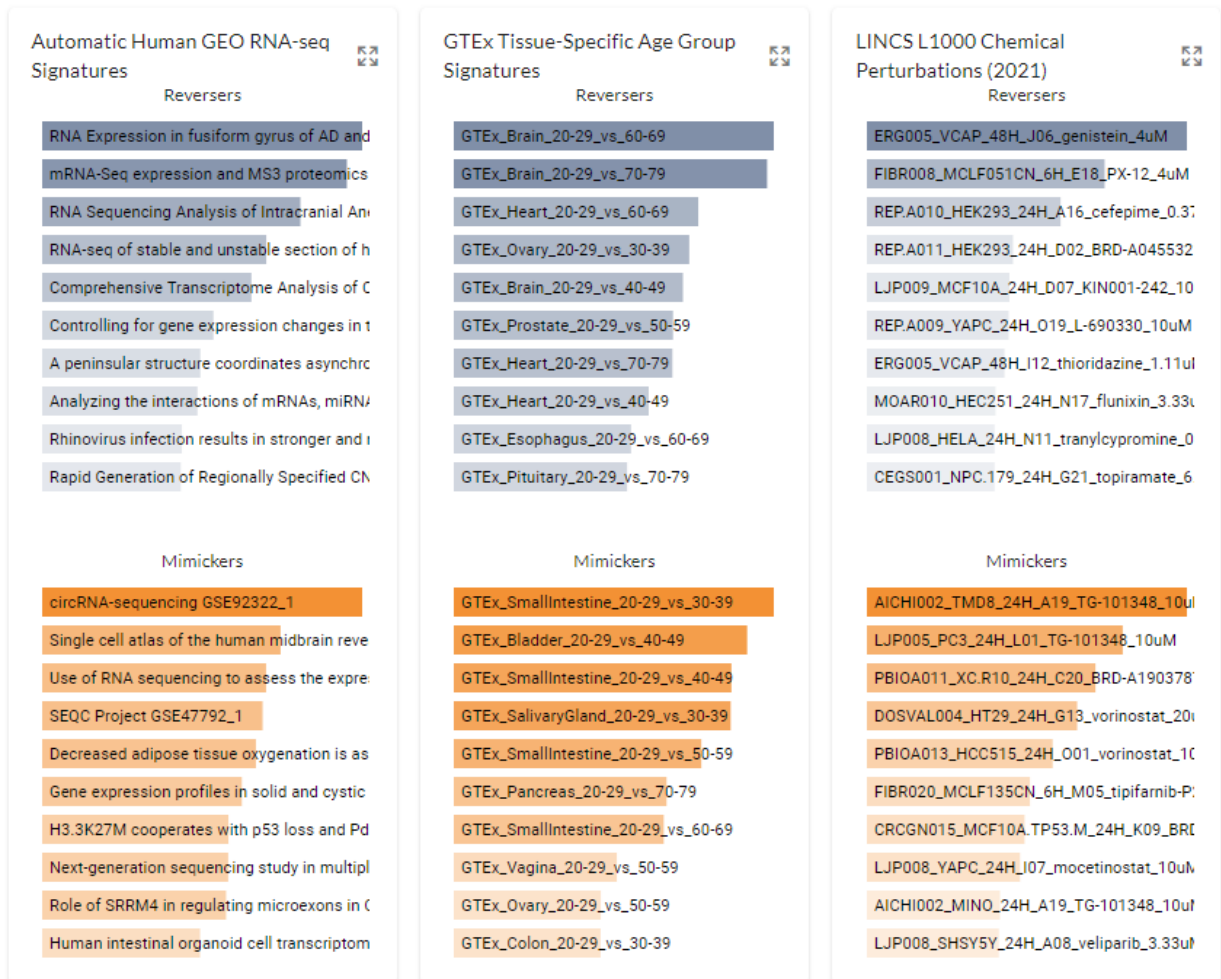

**Fig. S3 SigCom LINCS search results overview.** Once the user presses submit, the initial results page displays bar charts for each collection of signatures.

**Fig. S4**

| Reversers                                                                                    |                  |         |                |           |            |              |              |               |             |
|----------------------------------------------------------------------------------------------|------------------|---------|----------------|-----------|------------|--------------|--------------|---------------|-------------|
| <a href="#">FILTERS</a> <a href="#">EXPORT TABLE</a> <a href="#">EXPORT GENE RANK MATRIX</a> |                  |         |                |           |            |              |              |               |             |
| <input type="checkbox"/>                                                                     | Perturb...       | Dose    | Tissue         | Cell Line | Timepoi... | log p-val... | log p-val... | z-score (...) | p-value ... |
| <input type="checkbox"/>                                                                     | genistein        | 4 uM    | prostate gland | VCAP      | 48 h       | 31.21        | 12.87        | -10.39        | 1           |
| <input type="checkbox"/>                                                                     | PX-12            | 4 uM    |                | MCLF051CN | 6 h        | 26.34        | 12.34        | -9.509        | 1           |
| <input type="checkbox"/>                                                                     | cefepime         | 0.37 uM | kidney         | HEK293    | 24 h       | 25.00        | 8.298        | -9.036        | 1.9386e-2   |
| <input type="checkbox"/>                                                                     | BRD-A04553...    | 3.33 uM | kidney         | HEK293    | 24 h       | 21.69        | 10.21        | -8.525        | 1           |
| <input type="checkbox"/>                                                                     | KIN001-242       | 10 uM   | breast         | MCF10A    | 24 h       | 21.66        | 9.392        | -8.486        | 1           |
| <input type="checkbox"/>                                                                     | L-690330         | 10 uM   | pancreas       | YAPC      | 24 h       | 21.46        | 10.29        | -8.478        | 1           |
| <input type="checkbox"/>                                                                     | thioridazine     | 1.11 uM | prostate gland | VCAP      | 48 h       | 21.23        | 10.36        | -8.433        | 1           |
| <input type="checkbox"/>                                                                     | flunixin         | 3.33 uM | endometrium    | HEC251    | 24 h       | 21.00        | 9.077        | -8.337        | 1           |
| <input type="checkbox"/>                                                                     | tranlycypromi... | 0.12 uM | uterine cervix | HELA      | 24 h       | 20.88        | 9.427        | -8.327        | 1           |

  

| Mimickers                                                                                    |               |         |                  |           |            |              |              |               |             |
|----------------------------------------------------------------------------------------------|---------------|---------|------------------|-----------|------------|--------------|--------------|---------------|-------------|
| <a href="#">FILTERS</a> <a href="#">EXPORT TABLE</a> <a href="#">EXPORT GENE RANK MATRIX</a> |               |         |                  |           |            |              |              |               |             |
| <input type="checkbox"/>                                                                     | Perturb...    | Dose    | Tissue           | Cell Line | Timepoi... | log p-val... | log p-val... | z-score (...) | p-value ... |
| <input type="checkbox"/>                                                                     | TG-101348     | 10 uM   | lymphoid syst... | TMD8      | 24 h       | 28.28        | 13.78        | 9.905         | 1           |
| <input type="checkbox"/>                                                                     | TG-101348     | 10 uM   | prostate gland   | PC3       | 24 h       | 25.60        | 12.56        | 9.371         | 1           |
| <input type="checkbox"/>                                                                     | BRD-A19037... | 10 uM   | epithelium       | XCR10     | 24 h       | 25.52        | 8.489        | 9.145         | 1           |
| <input type="checkbox"/>                                                                     | vorinostat    | 20 uM   | intestine        | HT29      | 24 h       | 24.38        | 9.107        | 8.993         | 8.0642e-2   |
| <input type="checkbox"/>                                                                     | vorinostat    | 10 uM   | lung             | HCC515    | 24 h       | 23.41        | 8.782        | 8.789         | 1.5429e-1   |
| <input type="checkbox"/>                                                                     | tipifarnib-P2 | 4 uM    |                  | MCLF135CN | 6 h        | 21.96        | 10.95        | 8.601         | 1           |
| <input type="checkbox"/>                                                                     | BRD-A19037... | 1.11 uM | breast           | MCF10A    | 24 h       | 22.32        | 8.401        | 8.556         | 1           |
| <input type="checkbox"/>                                                                     | mocetinostat  | 10 uM   | pancreas         | YAPC      | 24 h       | 25.14        | 4.612        | 8.518         | 4.2123e-4   |
| <input type="checkbox"/>                                                                     | TG-101348     | 10 uM   | blood            | MINO      | 24 h       | 20.99        | 9.455        | 8.352         | 1           |

**Fig. S4 Tabular view of the top signatures.** Tabular views of the top signatures are provided for users to inspect the metadata and scores of the results. These tables are downloadable and are provided to the users in TSV format.



**Fig. S6**

Query SigCom LINCS signatures with any search term

dexamethasone

Example queries: dexamethasone / MAPK1 / STAT3 / blood

Signature Search

Genes   Datasets   Signatures (652)

|                                                                                                                                                                                                                                                                                                                                                                                          |                                                                                                                                                                                                                                                                                                                                                                                                                    |
|------------------------------------------------------------------------------------------------------------------------------------------------------------------------------------------------------------------------------------------------------------------------------------------------------------------------------------------------------------------------------------------|--------------------------------------------------------------------------------------------------------------------------------------------------------------------------------------------------------------------------------------------------------------------------------------------------------------------------------------------------------------------------------------------------------------------|
| <br><b>CPC006_A549_24H_F09_dexamethasone_10uM</b><br>LINCS L1000 Chemical Perturbations (2021)<br>Perturbagen: dexamethasone<br>Perturbation Type: Chemical   Dose: 10 uM<br>Tissue: lung   Cell Line: A549<br>Disease: lung cancer   Timepoint: 24 h<br>Data Level: 5   Creation Time: 2021-05-08      | <ul style="list-style-type: none"><li>Data and Signature Generation Center</li><li>Cell Line</li><li>Dataset</li></ul>                                                                                                                                                                                                                                                                                             |
| <br><b>CPC004_A375_6H_E13_dexamethasone_10uM</b><br>LINCS L1000 Chemical Perturbations (2021)<br>Perturbagen: dexamethasone<br>Perturbation Type: Chemical   Dose: 10 uM<br>Tissue: skin of body   Cell Line: A375<br>Disease: melanoma   Timepoint: 6 h<br>Data Level: 5   Creation Time: 2021-05-09 | <ul style="list-style-type: none"><li><input checked="" type="checkbox"/> LINCS L1000 Chemical Perturbations (2021) (652)</li><li><input type="checkbox"/> Small Molecules (213)</li><li><input type="checkbox"/> L1000 Dataset -small molecule, CRISPR perturbagens- LINCS Phase 2 (December 2015) (99)</li><li><input type="checkbox"/> L1000 Dataset -small molecule perturbagens- LINCS Phase 1 (94)</li></ul> |

**Fig. S6 Metadata search results.** The SigCom LINCS metadata search interface enables users to query the SigCom LINCS database for retrieving signatures using any search term, for example, a cell line, a drug, or a gene. Once the search is complete, filters can be used to narrow down the search.

**Fig. S7**

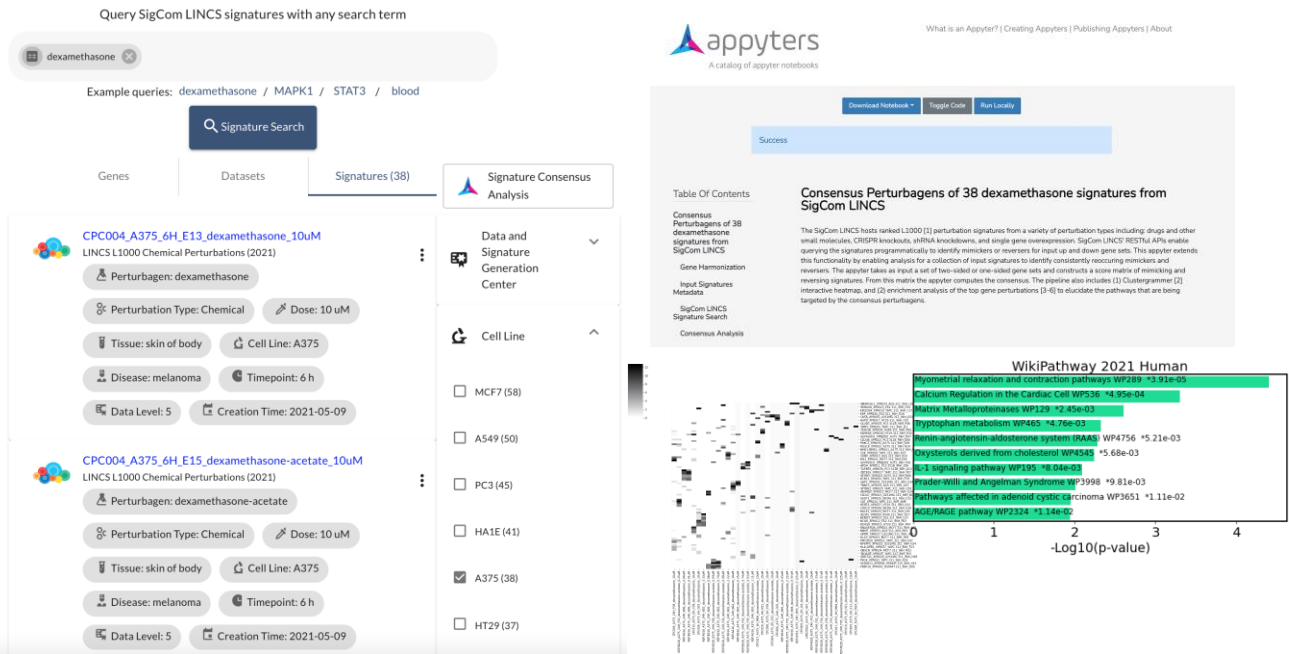

**Fig. S7 Consensus analysis.** SigCom LINCS provides an option to perform consensus analysis for a collection of signatures within the SigCom LINCS database. Metadata search queries that return less than 50 signature can be piped for analysis with the Signature Consensus Appyter. The SigCom LINCS Consensus Appyter produced a report that provides insights about the common mimickers and reversers across the collection of input signatures.



**Fig. S8**

The image shows a user interface for accessing signature data. On the left, a card displays the signature ID 'CPC014\_A375\_6H\_H21\_dexamethasone\_10uM' and 'LINCS L1000 Chemical Perturbations (2021)'. Below this, several metadata tags are shown in rounded rectangles: 'Perturbagen: dexamethasone', 'Perturbation Type: Chemical', 'Dose: 10 uM', 'Tissue: skin of body', 'Cell Line: A375', 'Disease: melanoma', 'Timepoint: 6 h', 'Data Level: 5', and 'Creation Time: 2021-05-14'. On the right, a white box with a shadow contains a list of actions: 'Perform Signature Search' (with a magnifying glass icon), 'Download Up and Down Genes' (with a downward arrow icon), 'Download Full Signature' (with a downward arrow icon), 'Top 100 Up to Enrichr' (with a red upward arrow icon), and 'Top 100 Down to Enrichr' (with a red downward arrow icon).

**Fig. S8 Accessing signature data.** Individual signatures can be downloaded as a JSON file or a GMT file that contain the up and down gene sets for the signature. Users can also use the signature data for SigCom LINCS signature search. Furthermore, the up or down gene sets can be sent to Enrichr for enrichment analysis.

Fig. S9

|                                                                                   |                                                                                                                                                                                                                                                           |
|-----------------------------------------------------------------------------------|-----------------------------------------------------------------------------------------------------------------------------------------------------------------------------------------------------------------------------------------------------------|
|  | <b>CPC006_A549_24H_F09_dexamethasone_10uM</b><br>LINCS L1000 Chemical Perturbations (2021)                                                                                                                                                                |
| md5                                                                               | d47b5c01a7925cf80084b7828a2bd9d4                                                                                                                                                                                                                          |
| doid                                                                              | DOID:1324                                                                                                                                                                                                                                                 |
| sha256                                                                            | 3ea8d45e3f143b663144d0733b17df8c51051a1eeffab45e85140191463e963a                                                                                                                                                                                          |
| tissue                                                                            | lung                                                                                                                                                                                                                                                      |
| anatomy                                                                           | UBERON:0002048                                                                                                                                                                                                                                            |
| cmap id                                                                           | CPC006_A549_24H:BRD-A35108200-001-04-7:10                                                                                                                                                                                                                 |
| disease                                                                           | lung cancer                                                                                                                                                                                                                                               |
| version                                                                           | 1                                                                                                                                                                                                                                                         |
| filename                                                                          | L1000_LINCS_DCIC_CPC006_A549_24H_F09_dexamethasone_10uM.tsv                                                                                                                                                                                               |
| local id                                                                          | CPC006_A549_24H_F09_dexamethasone_10uM                                                                                                                                                                                                                    |
| cell line                                                                         | A549                                                                                                                                                                                                                                                      |
| pert dose                                                                         | 10 uM                                                                                                                                                                                                                                                     |
| pert name                                                                         | dexamethasone                                                                                                                                                                                                                                             |
| pert time                                                                         | 24 h                                                                                                                                                                                                                                                      |
| pert type                                                                         | Chemical                                                                                                                                                                                                                                                  |
| data level                                                                        | 5                                                                                                                                                                                                                                                         |
| creation time                                                                     | 2021-05-08                                                                                                                                                                                                                                                |
| persistent id                                                                     | <a href="https://lincs-dcic.s3.amazonaws.com/LINCS-sigs-2021/cd/cp/L1000_LINCS_DCIC_CPC006_A549_24H_F09_dexamethasone_10uM.tsv">https://lincs-dcic.s3.amazonaws.com/LINCS-sigs-2021/cd/cp/L1000_LINCS_DCIC_CPC006_A549_24H_F09_dexamethasone_10uM.tsv</a> |
| size in bytes                                                                     | 345398                                                                                                                                                                                                                                                    |
| uncompressed size in bytes                                                        | 345398                                                                                                                                                                                                                                                    |

up                      down

CPC006\_A549\_24H\_F09\_dexamethasone\_10uM has 100 up genes.

 **S100A9**  
S100 calcium binding protein A9  
Gene ID: 6280    Taxon ID: 9606  
Synonyms: 60B8AG, CAGB, CFAG, CGLB, L1AG, LIAG, MAC387, MIF, MRP14, NIF, P14

---

 **NEAT1**  
nuclear paraspeckle assembly transcript 1 (non-protein coding)  
Gene ID: 283131    Taxon ID: 9606  
Synonyms: LINC00084, NCRNA00084, TncRNA, VINC

Fig. S9 Metadata pages Clicking on metadata search results opens the metadata landing page which features the expanded metadata of the entry.

**Fig. S10**

**A.**

Find Signatures that up- or down-regulate a single gene

🔍 Query single genes to receive signatures that maximally up- or down-regulate its expression

Example queries: ACE2 / STAT3 / MAPK1

GEO Reverse Search Appyter  RNA-seq-like Reverse Search Appyter

🔍 Search

**B.**

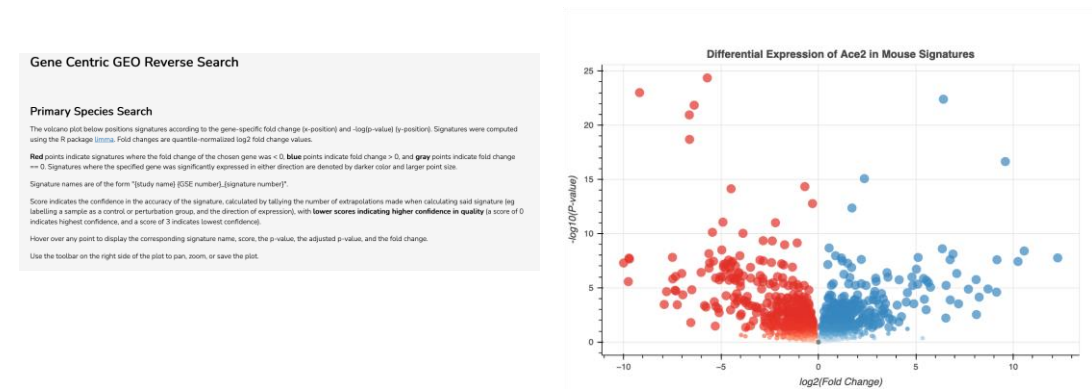

**C.**

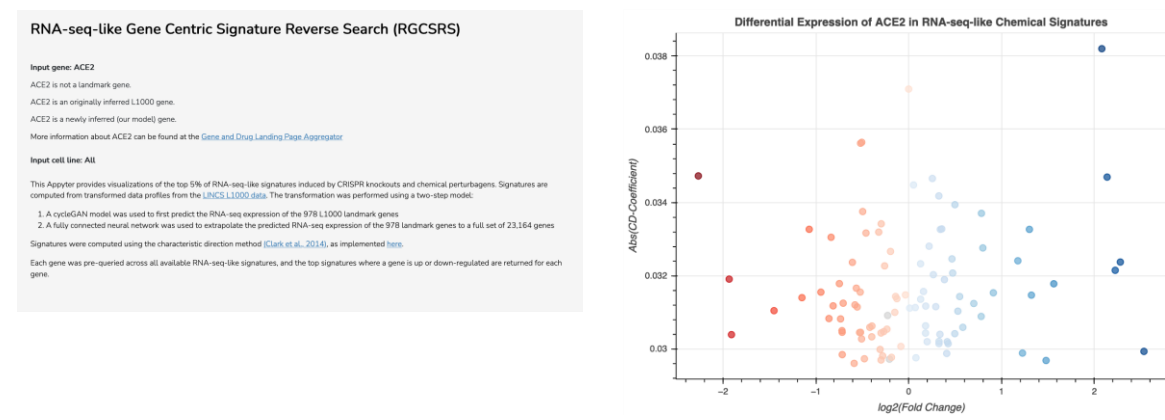

**Fig. S10 Single gene reverse search Appyters** A) The SigCom LINCS gene search page can be used to perform reverse signature search for a single human gene. The search identifies signatures that maximally up- or down-regulate the gene. Performing a gene search redirects the users to one of Appyters. B) The identified automated GEO signatures, and C) the RNA-seq-like signatures from L1000 signatures are visualized as volcano plots.

# Fig. S11

## RNA-seq Transcriptomics Signatures (Level 5)

| label                                  | date       | size    | shape      | file type | downloads | download |
|----------------------------------------|------------|---------|------------|-----------|-----------|----------|
| Automatic Human GEO RNA-seq Signatures | 2021-09-16 | 1.42GB  | 4269x35239 | tsv       | 4         |          |
| Automatic Mouse GEO RNA-seq Signatures | 2021-09-16 | 1.49GB  | 4216x32545 | tsv       | 0         |          |
| GTEx Tissue Age Comparison Signatures  | 2021-09-16 | 123.2MB | 135xVaries | tsvZip    | 1         |          |

## RNA-seq Transcriptomics Gene Sets (Level 5)

| label                                              | date       | size  | terms | file type | downloads | download |
|----------------------------------------------------|------------|-------|-------|-----------|-----------|----------|
| Automatic Human GEO RNA-seq Signatures             | 2021-09-20 | 7.6MB | 8538  | gmt       | 3         |          |
| Automatic Mouse GEO RNA-seq Signatures             | 2021-09-20 | 6.9MB | 8432  | gmt       | 1         |          |
| GTEx Tissue Age Comparison Signatures              | 2021-09-20 | 199KB | 270   | gmt       | 2         |          |
| CREEDS Manual Disease Signatures                   | 2021-10-04 | 3.2MB | 1656  | gmt       | 0         |          |
| CREEDS Manual Single Drug Perturbations            | 2021-10-04 | 3.4MB | 1750  | gmt       | 0         |          |
| CREEDS Manual Single Gene Perturbations            | 2021-10-04 | 8.4MB | 4352  | gmt       | 0         |          |
| SARS-CoV-2 Differential Gene Expression Signatures | 2021-10-05 | 846KB | 248   | gmt       | 0         |          |

## L1000 Characteristic Direction Coefficient Tables (Level 5)

All L1000 data that is provided here are derivative work that is significantly different from what is provided at [cloud.lincs.org](https://cloud.lincs.org), the original source of these data. The original data and signatures profiled and computed by the LINCS Broad Transcriptomics Data and Signature Generation Center (DSGC) are available from [cloud.lincs.org](https://cloud.lincs.org).

| label                                            | date       | size   | shape        | file type | downloads | download |
|--------------------------------------------------|------------|--------|--------------|-----------|-----------|----------|
| LINC15 L1000 Chemical Perturbations (2021)       | 2021-06-23 | 33.3GB | 12327x720216 | gctx      | 2         |          |
| LINC15 L1000 shRNA Perturbations (2021)          | 2021-06-23 | 7.3GB  | 12327x177263 | gctx      | 2         |          |
| LINC15 L1000 CRISPR Perturbations (2021)         | 2021-06-23 | 6.5GB  | 12327x141368 | gctx      | 0         |          |
| LINC15 L1000 Overexpression Perturbations (2021) | 2021-06-23 | 1.6GB  | 12327x34171  | gctx      | 0         |          |
| LINC15 L1000 Ligand Perturbations (2021)         | 2021-06-23 | 357MB  | 12327x7546   | gctx      | 2         |          |
| LINC15 L1000 Antibody Perturbations (2021)       | 2021-06-23 | 27.7MB | 12327x575    | gctx      | 3         |          |
| LINC15 L1000 siRNA Perturbations (2021)          | 2021-06-23 | 9.6MB  | 12327x162    | gctx      | 2         |          |

## Computed Signatures for CycleGAN Predicted RNA-Seq-Like Profiles of L1000 Samples (Level 5)

All L1000 data that is provided here are derivative work that is significantly different from what is provided at [cloud.lincs.org](https://cloud.lincs.org), the original source of these data. The original data and signatures profiled and computed by the LINCS Broad Transcriptomics Data and Signature Generation Center (DSGC) are available from [cloud.lincs.org](https://cloud.lincs.org).

| label                                            | date       | size    | shape        | file type | downloads | download |
|--------------------------------------------------|------------|---------|--------------|-----------|-----------|----------|
| LINC15 L1000 Chemical Perturbations (2021)       | 2021-10-11 | 68.07GB | 718055x23614 | gctx      | 0         |          |
| LINC15 L1000 shRNA Perturbations (2021)          | 2021-10-11 | 14.97GB | 158003x23614 | gctx      | 2         |          |
| LINC15 L1000 CRISPR Perturbations (2021)         | 2021-10-11 | 13.35GB | 148945x23614 | gctx      | 1         |          |
| LINC15 L1000 Overexpression Perturbations (2021) | 2021-10-11 | 3.24GB  | 34364x23614  | gctx      | 0         |          |
| LINC15 L1000 Ligand Perturbations (2021)         | 2021-10-11 | 716.0MB | 7546x23614   | gctx      | 0         |          |
| LINC15 L1000 Antibody Perturbations (2021)       | 2021-10-11 | 55.49MB | 575x23614    | gctx      | 0         |          |
| LINC15 L1000 siRNA Perturbations (2021)          | 2021-10-11 | 16.33MB | 162x23614    | gctx      | 0         |          |

## LINC15 Small Molecules Metadata

| label                           | date       | size  | file type | downloads | download |
|---------------------------------|------------|-------|-----------|-----------|----------|
| LINC15 Small Molecules Metadata | 2021-09-20 | 3.7MB | tsv       | 7         |          |

## Other Data Packages

Search:  Datasets (411) Signatures

ASSAY CENTER DATA FILE SIZE

- MGH (CMT) Growth Inhibition Assay Protocol (9 compound doses: 8 uM to 0.03125 uM) - DNA Staining  
MGH Center for Molecular Therapeutics (Massachusetts General Hospital)  
Assay: Fluorescence Imaging cell growth inhibition assay  
Date: 2014-09-28  
File Size: 345.30 KB  
Downloads: 0
- Eriolab KINOMEscan  
HMS LINC15 (Harvard Medical School)  
Assay: LINC15 KinomeScan kinase small molecule binding assay  
Date: 2013-10-16  
File Size: 12.44 KB  
Downloads: 0
- MGH (CMT) Growth Inhibition Assay Protocol (3 compound doses) - DNA Staining (Dm)  
MGH Center for Molecular Therapeutics (Massachusetts General Hospital)  
Assay: Fluorescence Imaging cell growth inhibition assay  
Date: 2014-09-28  
File Size: 288.44 KB  
Downloads: 0

## L1000 Characteristic Direction Up and Down Gene Sets (Level 5)

All L1000 data that is provided here are derivative work that is significantly different from what is provided at [cloud.lincs.org](https://cloud.lincs.org), the original source of these data. The original data and signatures profiled and computed by the LINCS Broad Transcriptomics Data and Signature Generation Center (DSGC) are available from [cloud.lincs.org](https://cloud.lincs.org).

| label                                            | date       | size    | terms   | file type | downloads | download |
|--------------------------------------------------|------------|---------|---------|-----------|-----------|----------|
| LINC15 L1000 Chemical Perturbations (2021)       | 2021-07-01 | 2.25GB  | 1436110 | gmt       | 5         |          |
| LINC15 L1000 shRNA Perturbations (2021)          | 2021-07-01 | 501.7MB | 316006  | gmt       | 1         |          |
| LINC15 L1000 CRISPR Perturbations (2021)         | 2021-07-01 | 438.4MB | 281890  | gmt       | 2         |          |
| LINC15 L1000 Overexpression Perturbations (2021) | 2021-07-01 | 106MB   | 68238   | gmt       | 0         |          |
| LINC15 L1000 Ligand Perturbations (2021)         | 2021-07-01 | 23.6MB  | 15092   | gmt       | 2         |          |
| LINC15 L1000 Antibody Perturbations (2021)       | 2021-07-01 | 1.8MB   | 1150    | gmt       | 2         |          |
| LINC15 L1000 siRNA Perturbations (2021)          | 2021-07-01 | 506KB   | 324     | gmt       | 2         |          |

## CycleGAN Predicted RNA-Seq-Like Profiles of L1000 Samples (Level 3)

All L1000 data that is provided here are derivative work that is significantly different from what is provided at [cloud.lincs.org](https://cloud.lincs.org), the original source of these data. The original data and signatures profiled and computed by the LINCS Broad Transcriptomics Data and Signature Generation Center (DSGC) are available from [cloud.lincs.org](https://cloud.lincs.org).

| label                                            | date       | size    | shape         | file type | downloads | download |
|--------------------------------------------------|------------|---------|---------------|-----------|-----------|----------|
| LINC15 L1000 Chemical Perturbations (2021)       | 2021-08-16 | 170.8GB | 1805898x23614 | gctx      | 0         |          |
| LINC15 L1000 shRNA Perturbations (2021)          | 2021-08-16 | 42.86GB | 453175x23614  | gctx      | 2         |          |
| LINC15 L1000 CRISPR Perturbations (2021)         | 2021-08-16 | 39.23GB | 414816x23614  | gctx      | 2         |          |
| LINC15 L1000 Controls (2021)                     | 2021-11-30 | 14.07GB | 148678x23614  | gctx      | 1         |          |
| LINC15 L1000 Overexpression Perturbations (2021) | 2021-08-16 | 12.46GB | 131668x23614  | gctx      | 0         |          |
| LINC15 L1000 Ligand Perturbations (2021)         | 2021-08-16 | 2.3GB   | 24301x23614   | gctx      | 0         |          |
| LINC15 L1000 Antibody Perturbations (2021)       | 2021-08-16 | 158.4MB | 1655x23614    | gctx      | 1         |          |
| LINC15 L1000 siRNA Perturbations (2021)          | 2021-08-16 | 46.4MB  | 472x23614     | gctx      | 2         |          |

**Fig. S11 The SigCom LINCS download page.** All links to the Level 5 full signatures data, Level 3 expression profiles, as well as GMT files of the up and down gene sets are accessible on the download page. Users are also provided links to the predicted RNA-seq-like profiles from L1000 samples as well as legacy LINCS datasets from the original LINCS data portal.

Fig. S12

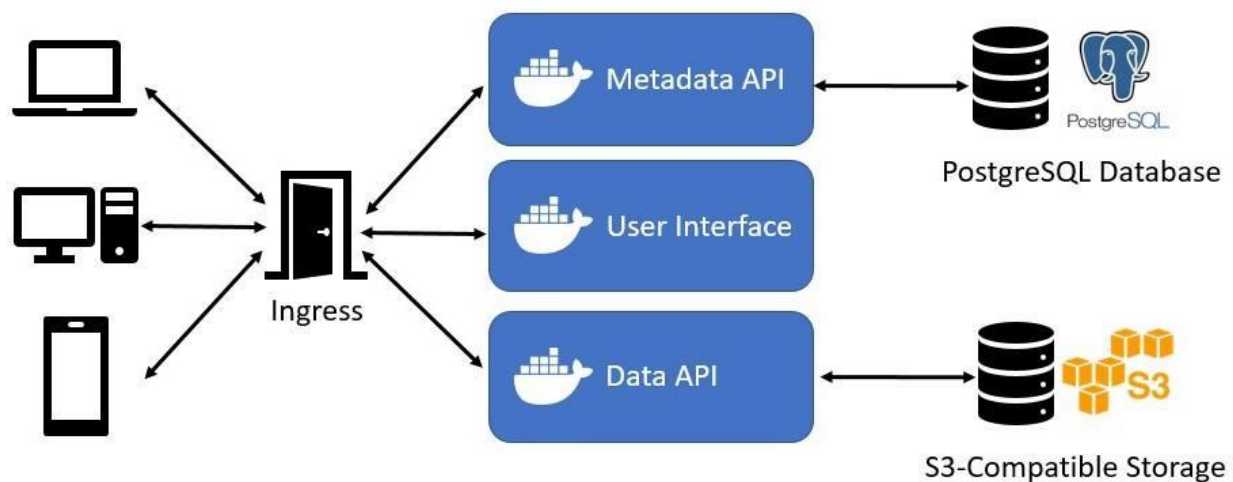

**Fig. S12 The Signature Commons architecture.** Signature Commons is composed of three microservices that are containerized with Docker. The SigCom LINCS repository provides images for ingress, as well as PostgreSQL and S3 storage. These are replaceable with services offered by cloud providers.

**Fig. S13**

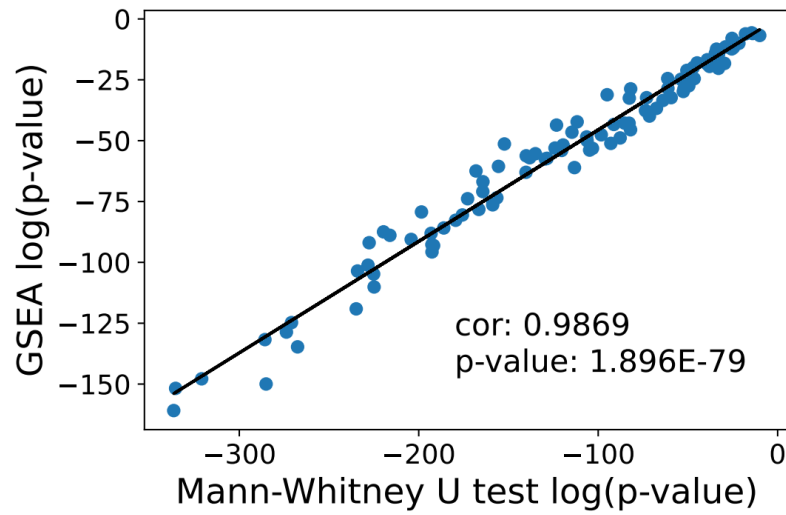

**Fig. S13 Comparing the MWU test with the GSEA test.** P-values produced by MWU and blitzGSEA for 100 gene sets with varying degrees of significance. To generate the random gene set ranks, we uniformly sample random rank positions in ranges of the full rank for different sizes of gene sets.

Fig. 14

The image displays three dataset entries from the LINCS Center for Transcriptomics (Broad Institute). Each entry includes a FAIRshake insignia, a title, a description, an assay type, a date, a file size, and a download count. The entries are:

- LINCS L1000 Overexpression Perturbations (2021)**: Assay: L1000 mRNA profiling assay, Date: 2021-06-10, File Size: 1.69 GB, Downloads: 0.
- LINCS L1000 CRISPR Perturbations (2021)**: Assay: L1000 mRNA profiling assay, Date: 2021-06-10, File Size: 6.98 GB, Downloads: 0.
- LINCS L1000 shRNA Perturbations (2021)**: Assay: L1000 mRNA profiling assay, Date: 2021-06-10, File Size: 7.83 GB, Downloads: 0.

**Fig. S14 FAIR Assessments of the datasets and signatures within SigCom LINCS.** The datasets and signatures in SigCom LINCS were assessed for FAIRness with FAIRshake with a unique rubric. These assessments are displayed near each dataset and signature entry as the FAIRshake insignia. Each square in the insignia represents a FAIR metric which asserts the adherence of the dataset and signature to the FAIR guiding principles.

## SUPPORTING TABLES

**Table S1**

| dataset                                  | Signatures | Perturbations (drugs, genes, diseases, age groups) | Tissues of origin | Cell lines |
|------------------------------------------|------------|----------------------------------------------------|-------------------|------------|
| LINCS L1000 Chemical Perturbations       | 718055     | 28564                                              | 34                | 196        |
| LINCS L1000 shRNA Perturbations          | 158003     | 4917                                               | 15                | 22         |
| LINCS L1000 CRISPR Perturbations         | 140945     | 5157                                               | 18                | 27         |
| LINCS L1000 Overexpression Perturbations | 34164      | 4040                                               | 10                | 20         |
| LINCS L1000 Ligand Perturbations         | 7546       | 329                                                | 8                 | 15         |
| Automatic Human GEO RNA-seq Signatures   | 4269       | -                                                  | -                 | -          |
| Automatic Mouse GEO RNA-seq Signatures   | 4216       | -                                                  | -                 | -          |
| CREEDS Manual Single Gene Perturbations  | 2176       | 870                                                | 1364              | -          |
| CREEDS Manual Single Drug Perturbations  | 875        | 271                                                | 648               | -          |
| CREEDS Manual Disease Signatures         | 828        | 333                                                | 501               | -          |
| LINCS L1000 Antibody Perturbations       | 575        | 4                                                  | 8                 | 12         |
| LINCS L1000 siRNA Perturbations          | 162        | 23                                                 | 1                 | 1          |
| GTEX Aging Signatures                    | 135        | 5                                                  | 28                | -          |

**Table S1. Signature types in SigCom LINCS.** SigCom LINCS catalogs over one million gene expression signatures along with their metadata generated from LINCS L1000 data, cDNA microarrays and RNA-seq from GEO, and RNA-seq data from GTEx.



**Table S2**

| <b>Label</b> | <b>Frequency</b> | <b>Category</b> | <b>num_gse</b> |
|--------------|------------------|-----------------|----------------|
| rep          | 23641            | 0               | 1733           |
| rna          | 16840            | 0               | 2040           |
| seq          | 13681            | 0               | 1829           |
| replicate    | 6047             | 0               | 465            |
| control      | 6023             | 1               | 1212           |
| sample       | 5762             | 0               | 266            |
| rnaseq       | 4654             | 0               | 363            |
| patient      | 4557             | 0               | 173            |
| cd           | 4244             | 0               | 261            |
| cells        | 4094             | 0               | 395            |
| dms0         | 3885             | 1               | 632            |
| hr           | 3318             | 0               | 158            |
| day          | 3317             | 0               | 180            |
| wt           | 3081             | 1               | 619            |
| tissue       | 3064             | 0               | 50             |
| lib          | 2744             | 0               | 16             |
| from         | 2727             | 0               | 1059           |
| post         | 2677             | 2               | 59             |
| donor        | 2642             | 0               | 159            |
| +            | 2389             | 0               | 268            |
| with         | 2115             | 0               | 169            |
| mcf          | 2029             | 0               | 223            |
| treated      | 2013             | 2               | 247            |
| hra          | 1943             | 0               | 4              |
| cgnd         | 1942             | 0               | 3              |
| ctrl         | 1939             | 1               | 351            |
| ko           | 1935             | 2               | 314            |
| enclb        | 1858             | 0               | 983            |
| shrna        | 1751             | 2               | 625            |
| mortem       | 1706             | 0               | 1              |
| seqc         | 1692             | 0               | 2              |

|           |      |   |     |
|-----------|------|---|-----|
| ilm       | 1691 | 0 | 1   |
| mrna      | 1642 | 0 | 177 |
| tumor     | 1629 | 2 | 91  |
| x         | 1553 | 0 | 97  |
| blood     | 1512 | 0 | 40  |
| fgc       | 1358 | 0 | 2   |
| fcc       | 1349 | 0 | 3   |
| nm        | 1311 | 0 | 101 |
| human     | 1305 | 0 | 135 |
| non       | 1279 | 0 | 121 |
| cell      | 1260 | 0 | 198 |
| sirna     | 1259 | 2 | 220 |
| il        | 1243 | 0 | 100 |
| ad        | 1234 | 0 | 61  |
| tr        | 1209 | 0 | 26  |
| healthy   | 1197 | 1 | 84  |
| vumc      | 1169 | 0 | 3   |
| tb        | 1165 | 0 | 18  |
| week      | 1152 | 0 | 21  |
| hd        | 1119 | 0 | 36  |
| acxx      | 1111 | 0 | 5   |
| treatment | 1090 | 2 | 80  |
| total     | 1083 | 0 | 320 |
| kd        | 1074 | 2 | 209 |
| subject   | 1064 | 0 | 29  |
| lb        | 1059 | 0 | 10  |
| mc        | 1013 | 0 | 17  |
| of        | 1008 | 0 | 116 |
| ms        | 1000 | 0 | 31  |
| clone     | 995  | 0 | 92  |
| hek       | 978  | 0 | 94  |
| ac        | 902  | 0 | 31  |
| platelets | 899  | 0 | 5   |
| untreated | 891  | 1 | 176 |
| na        | 889  | 0 | 13  |
| pre       | 888  | 0 | 57  |
| mock      | 887  | 1 | 191 |

|            |     |   |     |
|------------|-----|---|-----|
| hepg       | 877 | 0 | 323 |
| sh         | 877 | 0 | 135 |
| individual | 867 | 0 | 16  |
| gfp        | 865 | 0 | 132 |
| um         | 849 | 0 | 93  |
| in         | 846 | 0 | 83  |
| dox        | 820 | 2 | 111 |
| w          | 818 | 0 | 76  |
| vehicle    | 782 | 1 | 138 |
| exp        | 781 | 0 | 43  |
| biological | 765 | 0 | 59  |
| normal     | 764 | 1 | 107 |
| mda        | 751 | 0 | 104 |
| line       | 748 | 0 | 76  |
| subjects   | 748 | 0 | 2   |
| mb         | 747 | 0 | 105 |
| bd         | 745 | 0 | 13  |
| pc         | 737 | 0 | 95  |
| hcc        | 732 | 0 | 71  |
| mp         | 731 | 0 | 9   |
| ir         | 719 | 0 | 18  |
| hela       | 716 | 0 | 107 |
| at         | 716 | 0 | 41  |
| aml        | 707 | 0 | 33  |
| incap      | 690 | 0 | 79  |
| pf         | 667 | 0 | 17  |
| case       | 662 | 2 | 19  |
| baseline   | 661 | 1 | 25  |
| ipsc       | 658 | 0 | 71  |
| no         | 642 | 0 | 89  |
| lps        | 638 | 2 | 69  |
| pt         | 635 | 0 | 52  |
| for        | 632 | 0 | 81  |
| nt         | 619 | 0 | 105 |
| male       | 615 | 0 | 26  |
| primary    | 614 | 0 | 51  |
| hours      | 604 | 0 | 42  |

|            |     |   |     |
|------------|-----|---|-----|
| af         | 594 | 0 | 34  |
| batch      | 593 | 0 | 36  |
| lung       | 589 | 0 | 55  |
| cb         | 586 | 0 | 45  |
| hc         | 579 | 0 | 48  |
| hct        | 578 | 0 | 85  |
| su         | 570 | 0 | 30  |
| progressor | 567 | 0 | 3   |
| liver      | 562 | 0 | 49  |
| pbmc       | 560 | 0 | 34  |
| biopsy     | 555 | 0 | 14  |
| jq         | 547 | 0 | 69  |
| hrs        | 545 | 0 | 41  |
| time       | 542 | 0 | 18  |
| mir        | 533 | 0 | 83  |
| cancer     | 533 | 0 | 36  |
| infected   | 527 | 2 | 72  |
| fgf        | 519 | 2 | 7   |
| con        | 515 | 1 | 86  |
| hs         | 513 | 0 | 58  |
| gbm        | 509 | 0 | 22  |
| risk       | 509 | 0 | 3   |
| si         | 504 | 0 | 78  |
| bc         | 492 | 0 | 27  |
| plus       | 490 | 0 | 66  |
| us         | 489 | 0 | 15  |
| disease    | 484 | 2 | 18  |
| female     | 482 | 0 | 25  |
| nc         | 474 | 0 | 127 |
| knockdown  | 473 | 2 | 84  |
| subjectsle | 468 | 0 | 1   |
| high       | 461 | 0 | 68  |
| sl         | 458 | 0 | 12  |
| eu         | 457 | 0 | 6   |
| polya      | 456 | 0 | 98  |
| ctl        | 456 | 1 | 64  |
| mm         | 454 | 0 | 53  |

|                   |     |   |     |
|-------------------|-----|---|-----|
| <b>vector</b>     | 449 | 1 | 121 |
| <b>oe</b>         | 444 | 2 | 70  |
| <b>naïve</b>      | 441 | 1 | 20  |
| <b>fgfr</b>       | 432 | 0 | 3   |
| <b>parental</b>   | 429 | 0 | 84  |
| <b>neg</b>        | 424 | 1 | 76  |
| <b>pd</b>         | 422 | 0 | 48  |
| <b>sam</b>        | 419 | 0 | 15  |
| <b>sle</b>        | 414 | 0 | 15  |
| <b>tn</b>         | 413 | 0 | 8   |
| <b>dm</b>         | 412 | 0 | 39  |
| <b>npc</b>        | 412 | 0 | 37  |
| <b>ba</b>         | 411 | 0 | 21  |
| <b>molm</b>       | 404 | 0 | 37  |
| <b>cn</b>         | 403 | 0 | 9   |
| <b>ln</b>         | 402 | 0 | 31  |
| <b>veh</b>        | 397 | 1 | 78  |
| <b>repl</b>       | 397 | 0 | 26  |
| <b>ns</b>         | 395 | 0 | 47  |
| <b>ra</b>         | 394 | 0 | 42  |
| <b>low</b>        | 393 | 1 | 68  |
| <b>hesc</b>       | 393 | 0 | 53  |
| <b>sw</b>         | 389 | 0 | 53  |
| <b>mut</b>        | 382 | 2 | 44  |
| <b>patients</b>   | 377 | 0 | 5   |
| <b>re</b>         | 372 | 0 | 27  |
| <b>lane</b>       | 370 | 0 | 7   |
| <b>gm</b>         | 368 | 0 | 45  |
| <b>after</b>      | 366 | 2 | 26  |
| <b>uc</b>         | 361 | 0 | 17  |
| <b>tdimi</b>      | 361 | 0 | 1   |
| <b>ips</b>        | 359 | 0 | 37  |
| <b>yri</b>        | 359 | 0 | 1   |
| <b>panc</b>       | 356 | 0 | 40  |
| <b>pos</b>        | 355 | 0 | 46  |
| <b>and</b>        | 352 | 0 | 70  |
| <b>uninfected</b> | 349 | 1 | 39  |

|                    |     |   |    |
|--------------------|-----|---|----|
| <b>mv</b>          | 349 | 0 | 33 |
| <b>transfected</b> | 345 | 2 | 33 |
| <b>ls</b>          | 344 | 0 | 22 |
| <b>bgi</b>         | 342 | 0 | 3  |
| <b>imr</b>         | 339 | 0 | 43 |
| <b>fc</b>          | 339 | 0 | 15 |
| <b>fibroblasts</b> | 338 | 0 | 35 |
| <b>ex</b>          | 338 | 0 | 24 |
| <b>pa</b>          | 335 | 0 | 25 |
| <b>fulv</b>        | 335 | 0 | 3  |
| <b>cajmrnxx</b>    | 335 | 0 | 2  |
| <b>crohn's</b>     | 334 | 0 | 7  |
| <b>bt</b>          | 333 | 0 | 52 |
| <b>on</b>          | 333 | 0 | 31 |
| <b>nsclc</b>       | 333 | 0 | 6  |
| <b>dx</b>          | 331 | 2 | 4  |
| <b>repeat</b>      | 330 | 0 | 40 |
| <b>th</b>          | 325 | 0 | 24 |
| <b>whole</b>       | 322 | 0 | 18 |
| <b>may</b>         | 322 | 0 | 2  |
| <b>naive</b>       | 320 | 1 | 46 |
| <b>days</b>        | 319 | 0 | 30 |
| <b>ni</b>          | 319 | 0 | 16 |
| <b>msc</b>         | 318 | 0 | 38 |
| <b>bulk</b>        | 316 | 0 | 26 |
| <b>thp</b>         | 312 | 0 | 51 |
| <b>vu</b>          | 311 | 0 | 5  |
| <b>ht</b>          | 308 | 0 | 51 |
| <b>rv</b>          | 306 | 0 | 45 |
| <b>mg</b>          | 304 | 0 | 40 |
| <b>os</b>          | 303 | 0 | 44 |
| <b>empty</b>       | 301 | 0 | 73 |
| <b>sictrl</b>      | 301 | 1 | 68 |
| <b>sum</b>         | 301 | 1 | 29 |
| <b>cnl</b>         | 301 | 1 | 2  |
| <b>pbmcs</b>       | 299 | 0 | 14 |
| <b>cohort</b>      | 295 | 0 | 3  |

|                   |     |   |    |
|-------------------|-----|---|----|
| <b>tet</b>        | 293 | 0 | 31 |
| <b>aid</b>        | 290 | 0 | 18 |
| <b>kidney</b>     | 289 | 0 | 27 |
| <b>anxx</b>       | 289 | 0 | 5  |
| <b>pdac</b>       | 289 | 0 | 2  |
| <b>min</b>        | 287 | 0 | 35 |
| <b>ct</b>         | 287 | 1 | 34 |
| <b>sicontrol</b>  | 286 | 1 | 66 |
| <b>etoh</b>       | 286 | 0 | 42 |
| <b>pat</b>        | 286 | 0 | 8  |
| <b>sc</b>         | 285 | 1 | 41 |
| <b>prostate</b>   | 285 | 0 | 13 |
| <b>ca</b>         | 283 | 0 | 34 |
| <b>sk</b>         | 282 | 0 | 50 |
| <b>palbo</b>      | 281 | 0 | 4  |
| <b>colon</b>      | 280 | 0 | 31 |
| <b>tgfb</b>       | 278 | 0 | 35 |
| <b>type</b>       | 277 | 0 | 62 |
| <b>jc</b>         | 276 | 0 | 4  |
| <b>jia</b>        | 274 | 0 | 5  |
| <b>cgga</b>       | 274 | 0 | 1  |
| <b>technical</b>  | 270 | 0 | 12 |
| <b>derived</b>    | 269 | 0 | 33 |
| <b>negative</b>   | 268 | 1 | 57 |
| <b>mo</b>         | 268 | 0 | 16 |
| <b>jacxx</b>      | 268 | 0 | 3  |
| <b>ctr</b>        | 267 | 1 | 47 |
| <b>pdx</b>        | 267 | 0 | 28 |
| <b>wild</b>       | 265 | 1 | 60 |
| <b>fg</b>         | 262 | 0 | 4  |
| <b>nvs</b>        | 262 | 0 | 2  |
| <b>input</b>      | 260 | 0 | 52 |
| <b>gsk</b>        | 259 | 0 | 38 |
| <b>rpe</b>        | 259 | 0 | 36 |
| <b>stimulated</b> | 257 | 2 | 26 |
| <b>old</b>        | 257 | 0 | 21 |
| <b>fibroblast</b> | 256 | 0 | 45 |

|             |     |   |    |
|-------------|-----|---|----|
| agr         | 256 | 0 | 1  |
| hypoxia     | 255 | 0 | 43 |
| muscle      | 255 | 0 | 26 |
| st          | 255 | 0 | 26 |
| rseq        | 255 | 0 | 2  |
| huvec       | 252 | 0 | 44 |
| fetal       | 251 | 0 | 25 |
| tgf         | 251 | 0 | 22 |
| rs          | 251 | 0 | 21 |
| crpc        | 250 | 0 | 4  |
| tnf         | 249 | 0 | 33 |
| lv          | 249 | 0 | 17 |
| tu          | 248 | 0 | 9  |
| ev          | 247 | 0 | 70 |
| cc          | 247 | 0 | 29 |
| up          | 247 | 0 | 5  |
| scc         | 246 | 0 | 24 |
| mk          | 246 | 0 | 18 |
| hiv         | 245 | 0 | 17 |
| sgrna       | 244 | 0 | 24 |
| young       | 243 | 0 | 23 |
| controls    | 243 | 1 | 4  |
| fiin        | 241 | 0 | 1  |
| ifn         | 239 | 0 | 33 |
| nuclear     | 239 | 0 | 24 |
| dgm         | 239 | 0 | 11 |
| cr          | 238 | 0 | 31 |
| znf         | 237 | 0 | 18 |
| resistant   | 236 | 2 | 42 |
| ttr         | 236 | 0 | 3  |
| copd        | 236 | 0 | 2  |
| cm          | 235 | 0 | 42 |
| nd          | 233 | 0 | 27 |
| dld         | 231 | 0 | 20 |
| macrophages | 231 | 0 | 17 |
| dht         | 230 | 0 | 35 |
| skin        | 229 | 0 | 37 |



|               |     |   |    |
|---------------|-----|---|----|
| du            | 228 | 0 | 26 |
| wm            | 227 | 0 | 23 |
| br            | 226 | 0 | 18 |
| ut            | 225 | 0 | 35 |
| jurkat        | 224 | 0 | 31 |
| analyzed      | 224 | 0 | 8  |
| diff          | 222 | 0 | 22 |
| hi            | 220 | 0 | 22 |
| crispri       | 219 | 0 | 82 |
| pb            | 218 | 0 | 21 |
| overexpressed | 218 | 2 | 13 |
| ec            | 217 | 0 | 33 |
| sp            | 216 | 0 | 31 |
| mutant        | 213 | 2 | 35 |
| dc            | 211 | 0 | 36 |
| bm            | 211 | 0 | 35 |
| id            | 211 | 0 | 13 |
| ab            | 210 | 0 | 25 |
| cl            | 210 | 0 | 24 |
| tatagcct      | 210 | 0 | 1  |
| mrnaseq       | 209 | 0 | 19 |
| ggctctga      | 209 | 0 | 1  |
| nl            | 208 | 0 | 15 |
| analysis      | 208 | 0 | 12 |
| atagaggc      | 208 | 0 | 1  |
| hipsc         | 206 | 0 | 18 |
| al            | 206 | 0 | 8  |
| poly          | 204 | 0 | 37 |
| to            | 204 | 0 | 19 |
| gy            | 204 | 0 | 17 |
| nasal         | 204 | 0 | 7  |
| point         | 203 | 0 | 5  |
| moi           | 202 | 0 | 10 |
| sn            | 202 | 0 | 6  |
| meningioma    | 202 | 0 | 2  |
| paxgeneday    | 202 | 0 | 1  |
| µm            | 201 | 0 | 15 |

|                 |     |   |    |
|-----------------|-----|---|----|
| fd              | 201 | 0 | 12 |
| infection       | 200 | 2 | 15 |
| ml              | 199 | 0 | 31 |
| hour            | 199 | 0 | 16 |
| ileal           | 199 | 0 | 1  |
| ribo            | 198 | 0 | 17 |
| group           | 198 | 0 | 11 |
| differentiation | 197 | 0 | 12 |
| arthritis       | 197 | 0 | 3  |
| rectal          | 197 | 0 | 2  |
| globin          | 197 | 0 | 1  |
| block           | 197 | 0 | 1  |
| minus           | 195 | 0 | 30 |
| msi             | 195 | 0 | 7  |
| cctatcct        | 195 | 0 | 1  |
| pbs             | 194 | 0 | 38 |
| tc              | 194 | 0 | 18 |
| bx              | 193 | 0 | 7  |
| ng              | 192 | 1 | 22 |
| brain           | 191 | 0 | 34 |
| sb              | 191 | 0 | 21 |
| tm              | 191 | 0 | 17 |
| scramble        | 190 | 1 | 47 |
| egf             | 190 | 0 | 20 |
| rheumatoid      | 190 | 0 | 2  |
| cytoplasmic     | 189 | 0 | 14 |
| sm              | 188 | 0 | 13 |
| amc             | 188 | 0 | 4  |
| huh             | 185 | 0 | 33 |
| ar              | 185 | 0 | 27 |
| fnanxx          | 185 | 0 | 2  |
| shctrl          | 184 | 1 | 48 |
| sa              | 184 | 0 | 33 |
| follow          | 184 | 0 | 1  |
| hap             | 183 | 0 | 13 |
| hf              | 183 | 0 | 13 |
| hmec            | 183 | 0 | 7  |

|              |     |   |    |
|--------------|-----|---|----|
| tpm          | 183 | 0 | 2  |
| experiment   | 182 | 0 | 18 |
| dlpfc        | 182 | 0 | 4  |
| hl           | 180 | 0 | 27 |
| mt           | 180 | 2 | 23 |
| participant  | 180 | 0 | 2  |
| cnhi         | 180 | 0 | 1  |
| sr           | 179 | 0 | 22 |
| transduced   | 179 | 2 | 18 |
| hfanxx       | 179 | 0 | 2  |
| adult        | 178 | 0 | 32 |
| rh           | 178 | 0 | 21 |
| la           | 178 | 0 | 20 |
| vcap         | 177 | 0 | 19 |
| es           | 176 | 0 | 28 |
| lm           | 176 | 0 | 25 |
| rp           | 176 | 0 | 18 |
| hpi          | 175 | 0 | 16 |
| ov           | 175 | 0 | 12 |
| ta           | 175 | 0 | 11 |
| leicester    | 175 | 0 | 1  |
| longitudinal | 175 | 0 | 1  |
| cs           | 174 | 0 | 22 |
| timepoint    | 174 | 0 | 5  |
| nk           | 173 | 0 | 25 |
| xenograft    | 173 | 0 | 13 |
| aza          | 172 | 0 | 24 |
| as           | 171 | 0 | 29 |
| sf           | 171 | 0 | 24 |
| htert        | 171 | 0 | 19 |
| monocyte     | 171 | 0 | 16 |
| zt           | 171 | 0 | 2  |
| knockout     | 170 | 2 | 31 |
| set          | 170 | 0 | 16 |
| bj           | 169 | 0 | 28 |
| nb           | 169 | 0 | 27 |
| unstimulated | 169 | 1 | 27 |

|            |     |   |    |
|------------|-----|---|----|
| co         | 167 | 0 | 29 |
| all        | 167 | 0 | 20 |
| bs         | 167 | 0 | 7  |
| wb         | 167 | 0 | 4  |
| only       | 166 | 0 | 17 |
| msn        | 166 | 0 | 2  |
| adipose    | 165 | 0 | 17 |
| run        | 165 | 0 | 7  |
| validation | 165 | 0 | 4  |
| gs         | 164 | 0 | 8  |
| rpmi       | 163 | 0 | 25 |
| arid       | 163 | 0 | 19 |
| culture    | 162 | 0 | 17 |
| stim       | 162 | 0 | 11 |
| nutlin     | 161 | 2 | 21 |
| ovcar      | 161 | 0 | 19 |
| scr        | 160 | 1 | 38 |
| ifng       | 160 | 2 | 21 |
| discovery  | 160 | 0 | 2  |
| uacxx      | 160 | 0 | 1  |
| aypacxx    | 160 | 0 | 1  |
| aytacxx    | 160 | 0 | 1  |
| neuron     | 159 | 0 | 18 |
| bl         | 159 | 0 | 9  |
| year       | 158 | 0 | 5  |
| normoxia   | 157 | 0 | 27 |
| neurons    | 157 | 0 | 12 |
| nsc        | 156 | 0 | 29 |
| hep        | 155 | 0 | 32 |
| yap        | 155 | 0 | 23 |
| targeting  | 154 | 0 | 28 |
| mel        | 154 | 0 | 26 |
| obese      | 154 | 0 | 8  |
| mdamb      | 153 | 0 | 18 |
| hfwb       | 153 | 0 | 1  |
| gr         | 152 | 0 | 11 |
| sub        | 152 | 0 | 10 |

|                |     |   |    |
|----------------|-----|---|----|
| stem           | 151 | 0 | 22 |
| fb             | 151 | 0 | 19 |
| kras           | 151 | 0 | 10 |
| mgh            | 151 | 0 | 5  |
| nki            | 151 | 0 | 2  |
| gdanxx         | 151 | 0 | 1  |
| norm           | 150 | 1 | 9  |
| lesional       | 150 | 0 | 3  |
| expression     | 149 | 0 | 10 |
| lc             | 149 | 0 | 10 |
| epithelial     | 148 | 0 | 22 |
| ociaml         | 148 | 0 | 9  |
| heart          | 147 | 0 | 27 |
| alpha          | 147 | 0 | 17 |
| bone           | 147 | 0 | 17 |
| auxin          | 147 | 0 | 15 |
| epi            | 147 | 0 | 11 |
| dose           | 147 | 0 | 6  |
| acp            | 147 | 0 | 4  |
| ha             | 146 | 0 | 24 |
| lu             | 146 | 0 | 9  |
| diagnosis      | 145 | 0 | 4  |
| cil            | 144 | 0 | 13 |
| endo           | 144 | 0 | 11 |
| combo          | 142 | 0 | 23 |
| differentiated | 141 | 2 | 21 |
| tgacca         | 141 | 0 | 20 |
| cf             | 141 | 0 | 20 |
| cgatgt         | 141 | 0 | 17 |
| cg             | 141 | 0 | 5  |
| study          | 141 | 0 | 5  |
| lh             | 141 | 0 | 5  |
| bp             | 140 | 0 | 20 |
| condition      | 140 | 0 | 11 |
| dt             | 140 | 0 | 9  |
| cagatc         | 139 | 0 | 18 |
| ly             | 138 | 0 | 24 |

|                    |     |   |    |
|--------------------|-----|---|----|
| <b>dex</b>         | 138 | 2 | 22 |
| <b>acagtg</b>      | 138 | 0 | 17 |
| <b>yr</b>          | 138 | 0 | 5  |
| <b>cttgta</b>      | 137 | 0 | 18 |
| <b>gccaat</b>      | 137 | 0 | 17 |
| <b>undiff</b>      | 137 | 1 | 14 |
| <b>dn</b>          | 136 | 0 | 18 |
| <b>hmsc</b>        | 136 | 0 | 11 |
| <b>covid</b>       | 136 | 0 | 9  |
| <b>oci</b>         | 135 | 0 | 16 |
| <b>dcas</b>        | 135 | 0 | 13 |
| <b>colorectal</b>  | 135 | 0 | 4  |
| <b>lab</b>         | 135 | 0 | 4  |
| <b>pool</b>        | 134 | 0 | 18 |
| <b>aggcgaag</b>    | 134 | 0 | 1  |
| <b>zzz</b>         | 133 | 0 | 68 |
| <b>virus</b>       | 133 | 0 | 15 |
| <b>stimulation</b> | 133 | 2 | 6  |
| <b>sequencing</b>  | 133 | 0 | 4  |
| <b>hokt</b>        | 133 | 0 | 2  |
| <b>wildtype</b>    | 132 | 1 | 29 |
| <b>null</b>        | 132 | 1 | 25 |
| <b>positive</b>    | 132 | 2 | 23 |
| <b>pr</b>          | 132 | 0 | 19 |
| <b>serum</b>       | 132 | 0 | 17 |
| <b>atcacg</b>      | 132 | 0 | 16 |
| <b>miapaca</b>     | 132 | 0 | 16 |
| <b>tp</b>          | 132 | 0 | 16 |
| <b>cutll</b>       | 132 | 0 | 15 |
| <b>peripheral</b>  | 132 | 0 | 12 |

**Table S2 List of frequent terms identified in sample labels of GEO GSMs**

| Feature               | SigCom LINCS | L1000 FWD | clue.io | iLINCS | L1000 CDS2 | LDP1 | LD2   | LINCS Canvas Browser |
|-----------------------|--------------|-----------|---------|--------|------------|------|-------|----------------------|
| 2021 Release          | X            |           | X       |        |            |      |       |                      |
| Access Indv. Sigs.    | X            | X         |         | X      | X          |      | X     |                      |
| Sig. Search           | X            | X         | X       | X      | X          |      | X     | X                    |
| # of Sigs.            | ~1M          | ~16K      | ~1M     | ~200K  | ~20K       | N/A  | ~500K | ~100K                |
| Ontology Metadata     | X            |           |         | X      |            | X    | X     |                      |
| Gene Pages            | X            |           |         |        |            |      |       |                      |
| Drug Pages            |              | X         | X       |        |            |      | X     |                      |
| Metadata Search       | X            | X         | X       | X      |            | X    | X     |                      |
| Gene to Sigs.         | X            |           |         |        |            |      |       |                      |
| Terms to Sig.         | X            |           |         |        |            |      |       |                      |
| Open API              | X            | X         | X       | X      |            | X    | X     |                      |
| Regist. Required      |              |           | X       |        |            |      |       |                      |
| Heat maps             | X            |           | X       |        | X          |      |       | X                    |
| UMAP<br>PCA t-<br>SNE | X            | X         |         |        |            |      |       |                      |

**Table S3. Comparison of SigCom LINCS to other tools serving LINCS data and signatures.**
